# Supplementary material for: Carbon dioxide fluxes in a farmland ecosystem of the southern Chinese Loess Plateau measured using a chamber-based method
Source: PeerJ. 2020 Apr 27;8:e8994. doi: 10.7717/peerj.8994 (PMC7192157; doi:10.7717/peerj.8994)
Supplement: Supplemental Information 1 [file peerj-08-8994-s001.xlsx]

## Sheet: Fluxes
Time	Day of the year	NEE-maize	SR-maize	SR-barefield
Average		-0.192826	2.38788	0.99811
SE		1.84796	0.848879	0.238049
2011-06-03	154	0.6775	1.5054	0.9211
2011-06-04	155	0.7392	1.3758	1.0458
2011-06-05	156	0.5074	1.3654	0.7637
2011-06-06	157	0.7312	1.75	1.1626
2011-06-07	158	0.5446	1.7018	1.1409
2011-06-08	159	0.1487	1.4423	0.8903
2011-06-09	160	-0.1308	1.1551	0.5
2011-06-10	161	-0.5841	1.4103	0.7281
2011-06-11	162	-0.9016	1.5045	0.7725
2011-06-12	163	-1.1768	1.3845	0.6762
2011-06-13	164	-0.5462	1.2061	0.5053
2011-06-14	165	-1.3289	1.5564	0.902
2011-06-15	166	-1.2594	1.6975	0.9944
2011-06-16	167	-0.3345	1.4631	0.7285
2011-06-17	168	-0.4727	1.6909	0.9422
2011-06-18	169	-0.1572	1.5715	0.8
2011-06-19	170	-1.9343	1.7089	0.919
2011-06-20	171	-0.3364	1.4609	0.6535
2011-06-21	172	0.4933	1.9721	1.1338
2011-06-22	173	-0.8481	2.1898	1.4091
2011-06-23	174	-3.7497	2.6187	1.627
2011-06-24	175	-1.2825	2.0157	1.4779
2011-06-25	176	-1.8254	1.6551	1.038
2011-06-26	177	0.9264	1.2682	0.6197
2011-06-27	178	-1.9059	2.5622	1.4879
2011-06-28	179	-1.728	2.5301	1.512
2011-06-29	180	-1.4547	2.3981	1.3755
2011-06-30	181	-0.031	2.2337	1.2104
2011-07-01	182	0.8268	2.0545	1.0097
2011-07-02	183	1.0715	2.4912	1.0927
2011-07-03	184	-0.6097	2.5188	1.1321
2011-07-04	185	0.8829	2.3081	0.9152
2011-07-05	186	-0.432	2.223	0.8455
2011-07-06	187	-0.864	2.147	0.7198
2011-07-07	188	-1.1627	2.7362	1.2586
2011-07-08	189	-5.1527	2.6843	1.33
2011-07-09	190	-1.0459	1.8164	0.5681
2011-07-10	191	-2.5578	1.7159	0.843
2011-07-11	192	-6.0377	2.1258	1.1953
2011-07-12	193	-5.0795	2.0284	1.0412
2011-07-13	194	-4.2537	2.2033	1.0024
2011-07-14	195	-4.2534	2.4082	1.2107
2011-07-15	196	-3.3282	2.3082	1.2319
2011-07-16	197	-3.5588	2.1834	1.1484
2011-07-17	198	-4.4263	2.5541	1.1829
2011-07-17	199	-4.3462	2.9694	1.0829
2011-07-18	200	-2.653	3.0778	1.1347
2011-07-19	201	-1.7302	3.4621	0.7901
2011-07-20	202	0.2507	3.1434	0.6733
2011-07-21	203	-1.4287	3.5666	0.9285
2011-07-22	204	-0.3215	3.2565	0.8194
2011-07-23	205	-0.9015	3.2979	0.9797
2011-07-24	206	-0.9216	3.3751	1.0543
2011-07-25	207	-1.0093	3.2392	0.8809
2011-07-26	208	-1.0731	3.3668	0.9417
2011-07-27	209	1.9949	2.2367	0.71
2011-07-28	210	1.8551	1.5542	0.4698
2011-07-29	211	1.5082	3.7279	0.9976
2011-07-31	212	3.3326	4.863	0.8532
2011-08-01	213	1.4509	4.8643	1.0995
2011-08-02	214	1.296	4.6452	1.1232
2011-08-03	215	0.864	4.4261	1.2096
2011-08-04	216	0.6912	4.207	1.1664
2011-08-05	217	0.432	3.9879	1.1232
2011-08-06	218	0.1728	3.7687	1.1448
2011-08-07	219	-0.864	3.5496	1.1016
2011-08-08	220	-0.9504	3.3305	1.08
2011-08-09	221	-1.1311	3.1114	1.08
2011-08-10	222	-1.0729	3.1823	1.1056
2011-08-11	223	-0.3142	3.2913	1.1088
2011-08-12	224	0.1436	3.2519	1.0965
2011-08-13	225	0.0010748	3.0815	1.106
2011-08-14	226	0.4443	3.1596	1.1996
2011-08-15	227	0.2527	2.8465	1.2588
2011-08-16	228	0.7148	2.5653	1.239
2011-08-17	229	1.8709	2.284	1.1895
2011-08-18	230	2.3668	2.0875	0.817
2011-08-19	231	2.4071	2.3446	0.9435
2011-08-20	232	2.2494	1.9483	0.8799
2011-08-21	233	0.8595	2.152	1.0856
2011-08-22	234	1.1907	2.5232	1.1157
2011-08-23	235	0.8219	2.8103	1.1951
2011-08-24	236	0.3851	2.5654	1.211
2011-08-25	237	0.7614	2.5612	1.0836
2011-08-26	238	0.3804	2.7014	1.2742
2011-08-27	239	0.432	2.6088	1.2312
2011-08-28	240	0.5875	2.5162	1.1232
2011-08-29	241	0.6221	2.4235	1.0368
2011-08-30	242	0.7492	2.3309	0.9325
2011-08-31	243	1.4314	2.1557	1.1109
2011-09-01	244	1.5155	2.2848	1.2616
2011-09-02	245	1.2725	2.1282	1.1057
2011-09-03	246	2.6775	1.9328	0.9147
2011-09-03	247	2.8611	2.0863	1.012
2011-09-04	248	1.8457	1.1223	0.4738
2011-09-05	249	1.5583	1.1873	0.5702
2011-09-06	250	1.0252	1.4862	0.9485
2011-09-07	251	1.1162	1.7571	0.7655
2011-09-08	252	1.4324	1.5117	0.731
2011-09-09	253	1.3795	1.5158	0.6774
2011-09-10	254	1.4767	1.4896	0.6822
2011-09-12	255	1.6416	1.5027	0.7128
2011-09-13	256	1.728	1.5059	0.7344
2011-09-14	257	1.8144	1.509	0.7603

## Sheet: Duinal
		NEEmaize	Srmaize	SR-bare	Ta	Ts-10-bare	Ts-20-bare	Ts-10-maize	Ts-20maize
2011-07-27	0	1.77293	2.25703	0.1786	16.3	26.625	26.2656	25.1562	24.8828
2011-07-27 01:00:00	1	1.77192	2.18383	0.0399348	16.2	26.125	26.0938	24.75	24.7109
2011-07-27 02:00:00	2	1.67051	2.25889	0.08	16.2	25.625	25.8906	24.3438	24.5234
2011-07-27 03:00:00	3	1.59946	2.46215	0.129537	15.4	25.1719	25.6719	23.9531	24.3203
2011-07-27 04:00:00	4	1.70957	2.36193	0.318856	15.1	24.7188	25.4375	23.5781	24.1094
2011-07-27 05:00:00	5	1.66397	2.4632	0.318645	15.6	24.3281	25.2188	23.2422	23.9062
2011-07-27 06:00:00	6	1.54593	2.44183	0.257217	15.6	23.9375	24.9688	22.9219	23.6797
2011-07-27 07:00:00	7	0.59269	2.61541	0.464486	15.9	23.5625	24.75	22.6094	23.4844
2011-07-27 08:00:00	8	-1.01807	2.82972	0.644061	16.2	23.2812	24.5156	22.375	23.2812
2011-07-27 09:00:00	9	-2.78194	3.27582	1.21497	18.2	23.0156	24.2969	22.1719	23.0859
2011-07-27 10:00:00	10	-4.63199	3.97266	1.58327	18.8	22.9531	24.0938	22.1172	22.9297
2011-07-27 11:00:00	11	-5.20384	4.43035	1.84771	20.8	23.1875	23.9531	22.2812	22.8125
2011-07-27 12:00:00	12	-5.0315	4.70965	2.16812	21.6	23.7812	23.8594	22.7031	22.75
2011-07-27 13:00:00	13	-4.89418	4.91147	2.29155	22.2	24.7031	23.8906	23.3828	22.8047
2011-07-27 14:00:00	14	-4.36998	4.92747	2.0929	23.2	25.7969	24.0312	24.3281	22.9609
2011-07-27 15:00:00	15	-3.77199	4.59074	1.89761	24.3	26.9688	24.3438	25.3438	23.2656
2011-07-27 16:00:00	16	-2.24649	3.88964	1.7536	24.7	28.0781	24.7188	26.2266	23.6406
2011-07-27 17:00:00	17	-1.0167	3.71942	1.55107	25.4	29.0156	25.1875	26.9141	24.0469
2011-07-27 18:00:00	18	-0.295255	3.39918	0.990014	25.4	29.7188	25.6719	27.4375	24.4453
2011-07-27 19:00:00	19	1.61735	3.13519	0.655388	23.7	30.0938	26.1094	27.7578	24.7891
2011-07-27 20:00:00	20	2.46634	2.80552	0.483411	20	30.125	26.5156	27.8438	25.1172
2011-07-27 21:00:00	21	2.03284	2.61945	0.0260752	16.2	29.8906	26.8281	27.7031	25.3594
2011-07-27 22:00:00	22	2.14719	2.83654	0.435496	16.3	29.4688	27.0156	27.4062	25.5
2011-07-27 23:00:00	23	2.2516	2.83897	0.477301	16.4	29	27.0938	27.0469	25.5625

## Sheet: Grain yield
samples	grain per sample g/m2	Average g/m2	Cgr
1	525.35	621.1	234.599
2	793.18
3	544.77

## Sheet: Environmental & Soil variables
Time	Day of the year	T-a	PAR/(mol/m2/s)	Ts-10maize	T-20maize	Ts-10bare	T-20bare	Rainfall/mm	SWCmaize-10cm	SWC-bare				SOC_0-20cm	maize	bare
	Average	20.2811	33.2007	21.076	20.7533	22.2847	21.9094	3.31538	15.356	13.9728
	SE	2.93161	16.4696	2.0556	1.78922	2.31927	1.96141	7.50152	5.52272	5.02011
2011-06-03	154	17.1292	43.377	20.2526	19.6302	20.181	19.4779	0						n1	7.54395	5.79073
2011-06-04	155	18.0667	51.435	20.5911	19.7214	20.64	19.6159	0						n2	7.58643	6.34
2011-06-05	156	18.7	34.867	21.0859	20.3698	21.1712	20.332	0						n3	6.88156	5.65646
2011-06-06	157	22.3708	52.196	22.0182	20.8594	22.2344	20.791	0						n4	6.63968	5.91786
2011-06-07	158	23.0792	60.471	23.3099	22.0052	23.5651	21.9538	0						n5	6.12807	7.14121
2011-06-08	159	24.2917	45.692	23.8802	22.8828	24.2493	22.9408	0						n6	6.33559	7.19003
2011-06-09	160	20.3042	23.569	22.7682	22.3828	23.002	22.6426	0.2						Average	6.85	6.34
2011-06-10	161	18.9208	56.238	22.0729	21.3125	22.4303	21.5247	0						SE	0.609079	0.679943
2011-06-11	162	21.625	46.843	23.599	22.6432	23.9707	22.7865	0
2011-06-12	163	22.5042	50.842	23.9948	23.0391	24.3281	23.1823	0	12.5279	9.61887
2011-06-13	164	22.3333	26.581	23.6536	23.099	23.9401	23.3353	0
2011-06-14	165	20.8667	45.126	23.151	22.4297	23.4447	22.6302	0
2011-06-15	166	21.3417	51.552	24.0651	23.1016	24.2819	23.1875	0
2011-06-16	167	21.7958	21.254	23.8307	23.362	23.9688	23.4824	0
2011-06-17	168	18.6	20.115	22.2005	22.1146	22.2715	22.362	5.6
2011-06-18	169	17.2042	14.044	20.3203	20.5365	20.4447	20.8594	0
2011-06-19	170	20.1208	35.583	20.9271	20.3958	21.1003	20.5553	0
2011-06-20	171	18.4125	13.123	21.0104	20.9062	21.0833	21.0833	1.4
2011-06-21	172	17.0333	9.92	19.5339	19.599	19.6217	19.8542	11.8
2011-06-22	173	18.4542	11.374	19.5703	19.4453	19.6673	19.6393	1.8
2011-06-23	174	21.2125	59.764	20.4089	19.5964	20.666	19.7044	0.2
2011-06-24	175	24.7375	57.767	23.0078	21.7656	23.3835	21.8411	0
2011-06-25	176	22.5542	46.64	24.151	23.0833	24.3086	23.0931	0
2011-06-26	177	18.3	7.752	22.4661	22.4531	22.375	22.5488	8.6
2011-06-27	178	19.4417	53.758	21.25	20.763	21.5736	20.9967	0.2
2011-06-28	179	22.5375	59.676	22.649	22.3798	22.863	22.6154	0	15.5243	11.9732
2011-06-29	180	24.0917	51.936	24.3333	23.2786	24.7565	23.4609	0
2011-06-30	181	24.1542	47.861	25.0707	23.9484	25.7928	24.3613	0
2011-07-01	182	25.1208	20.004	24.849	24.2135	25.403	24.6914	0
2011-07-02	183	23.9292	9.874	23.1458	22.9974	23.5182	23.5384	4.2
2011-07-03	184	24.2542	23.308	22.5104	22.2057	22.8783	22.6576	0.4
2011-07-04	185	24.05	15.44	22.2474	21.9974	22.6094	22.4655	0
2011-07-05	186	23.8167	9.471	21.1719	21.2604	21.4746	21.7409	6.8
2011-07-06	187	24.0917	14.571	19.763	19.987	20.0169	20.4661	7.6
2011-07-07	188	25.7875	58.183	20.0339	19.7578	20.5072	20.1478	0
2011-07-08	189	20.5417	59.552	20.9609	20.4427	21.974	21.1478	0	16.2714	15.6613
2011-07-09	190	21.7208	19.519	21.0885	20.9297	22.1022	21.9557	0
2011-07-10	191	21.175	22.518	20.0625	19.9922	20.8138	20.8581	0
2011-07-11	192	21.2042	51.712	20.7734	20.2031	21.8132	20.9668	0
2011-07-12	193	22.5042	41.501	21.6979	21.1172	23.1061	22.2142	0
2011-07-13	194	22.9083	39.555	22.401	21.6927	23.9141	22.9115	0.2
2011-07-14	195	21.8792	54.017	22.8932	22.0755	24.7969	23.5208	1.2
2011-07-15	196	20.8083	52.178	23.013	22.401	25.0456	24.1172	0.6
2011-07-16	197	22.2417	56.21	23.026	22.3906	25.1322	24.1829	12.2
2011-07-17	198	20.7667	49.357	22.7292	22.3854	24.7383	24.3301	7.4
2011-07-17	199	22.9417	55.243	21.6641	21.4818	23.3848	23.2109	0
2011-07-18	200	23.2583	42.254	22.2552	21.8438	23.7539	23.3848	6
2011-07-19	201	20.45	45.716	22.1979	21.7943	23.7428	23.1751	0
2011-07-20	202	19.9792	29.136	21.9896	21.7812	23.5299	23.3893	4.6
2011-07-21	203	18.3333	48.149	21.8151	21.4401	23.39	22.8372	0
2011-07-22	204	22.1708	36.113	22.125	21.7292	23.9961	23.388	0.2
2011-07-23	205	23.6583	42.006	22.5156	21.9531	24.5762	23.6816	0
2011-07-24	206	23.9958	48.469	23.349	22.6042	25.8652	24.6523	0
2011-07-25	207	19.1125	45.302	23.7396	23.0938	26.4909	25.4206	1.2
2011-07-26	208	19.1542	55.241	23.2396	22.7266	26.2155	25.2676	0.2
2011-07-27	209	19.3125	12.191	23.25	23.0599	25.5293	25.5827	32.8
2011-07-28	210	21.5917	15.965	20.875	21.1589	22.1387	22.9206	20.2
2011-07-29	211	20.8083	32.675	20.349	20.3359	21.7578	21.8822	0
2011-07-31	212	18.2917	10.951	20.2344	20.375	21.5352	21.9115	6.2
2011-08-01	213	17.1042	24.853	19.3307	19.474	20.5638	20.862	0	23.7787	22.6874
2011-08-02	214	20.4708	54.599	19.9896	19.7083	21.6497	21.1641	0
2011-08-03	215	19.4667	32.118	20.6667	20.3854	22.3249	21.9668	0
2011-08-04	216	19.1667	19.47	20.3958	20.2865	21.7975	21.7995	0
2011-08-05	217	19	28.443	19.974	19.901	21.4505	21.3561	0.2
2011-08-06	218	20.425	50.194	20.099	19.8542	22.069	21.4954	0
2011-08-07	219	20.8792	44.176	20.9479	20.513	23.3177	22.4766	0.2
2011-08-08	220	22.0833	47.151	21.3698	20.9271	24.2376	23.2246	0
2011-08-09	221	22.4333	51.381	21.3464	21.0234	24.612	23.7383	0
2011-08-10	222	21.925	47.49	21.5677	21.1849	25.0859	24.1868	0
2011-08-11	223	22.7792	39.191	22	21.5495	25.4408	24.5801	0
2011-08-12	224	23.425	33.743	22.3932	21.9062	25.5905	24.8281	0
2011-08-13	225	23.6625	30.404	22.6354	22.1484	25.5938	24.8698	0
2011-08-14	226	25.0125	30.717	23.1172	22.5286	25.9811	25.1198	0
2011-08-15	227	25.6417	30.36	23.6641	23.0339	26.5371	25.6563	6.2
2011-08-16	228	20.5958	21.942	22.4115	22.4115	24.4049	24.735	0
2011-08-17	229	19.6792	12.792	21.1562	21.2682	22.724	23.2507	12.8
2011-08-18	230	15.8875	6.758	19.6016	20.0781	20.6068	21.6654	4.8
2011-08-19	231	15.8792	5.856	18.5521	18.974	19.4622	20.3333	7.8
2011-08-20	232	15.4917	4.219	17.8854	18.276	18.5039	19.4154	30.6
2011-08-21	233	17.0917	20.856	17.7005	17.7786	18.515	18.7174	15.4	5.65701	7.40607
2011-08-22	234	17.3417	15.526	18.3411	18.276	19.5176	19.5254	0
2011-08-23	235	18.4042	28.601	18.7526	18.5573	20.1706	19.8542	0
2011-08-24	236	19.3083	43.695	19.2344	18.9479	21	20.4616	0
2011-08-25	237	19.2833	32.868	19.7708	19.4714	21.5267	21.125	0.2
2011-08-26	238	16.8708	46.042	19.0781	19.0703	20.8079	20.7259	0
2011-08-27	239	19.0875	35.5	19.4844	19.2656	21.3223	20.9967	0
2011-08-28	240	20.0125	31.954	19.888	19.5859	21.5938	21.2122	0
2011-08-29	241	20.7875	35.658	20.3359	19.9635	21.9844	21.5085	0
2011-08-30	242	21.2917	34.434	20.6458	20.2656	22.2975	21.7819	0	18.377	16.4903
2011-08-31	243	20.8875	28.939	20.7865	20.4688	22.4596	21.9974	0
2011-09-01	244	21.1792	34.298	20.7917	20.487	22.8607	22.2383	0.2
2011-09-02	245	21.4917	28.657	20.9427	20.651	23.0996	22.6003	0
2011-09-03	246	19.2583	6.938	20.4948	20.4609	22.0645	22.2305	9
2011-09-03	247	17.8833	6.726	19.5625	19.6927	20.582	21.0195	7.2
2011-09-04	248	14.2417	6.158	17.9115	18.4062	18.4063	19.4473	37
2011-09-05	249	13.9125	9.576	16.8906	17.3073	17.4714	18.2259	18.2
2011-09-06	250	16.6542	29.844	17.1771	17.1953	18.2533	18.2546	0
2011-09-07	251	16.0708	37.762	17.526	17.5208	18.8913	18.8171	0
2011-09-08	252	15.2708	21.882	17.5365	17.6146	18.8073	19.0059	7.8
2011-09-09	253	13.0958	10.787	16.7214	17.0651	17.5137	18.276	0
2011-09-10	254	13.9833	6.231	16	16.2995	16.6185	17.2695	37.8
2011-09-12	255	16.7875	30.621	16.5677	16.401	17.6185	17.3568	0
2011-09-13	256	15.2167	21.544	17.2109	17.0859	18.2337	18.2031	7.4
2011-09-14	257	12.775	16.178	16.3047	16.5391	16.9766	17.526	0.2
